# Supplementary material for: Influenza A virus is transmissible via aerosolized fomites
Source: PubMed Central journal article supplement (PMC7435178; doi:10.1038/s41467-020-17888-w), 2020-08-18
Supplement: 41467_2020_17888_MOESM3_ESM.pdf [file 41467_2020_17888_MOESM3_ESM.pdf]

## Description of Additional Supplementary Files

**File Name:** Supplementary Movie 1

**Description:** An infected guinea pig grooming. Pan99- infected guinea pig grooms itself, potentially facilitating virus spread to its body and environment.

**File Name:** Supplementary Movie 2

**Description:** Crumpling and rubbing paper tissue. A gloved hand rubbing a paper tissue in front of a stainless-steel funnel attached to an APS.
